# Supplementary material for: Teeth, Sex, and Testosterone: Aging in the World's Smallest Primate
Source: PubMed Central journal article supplement (PMC4212904; doi:10.1371/journal.pone.0109528), 2014-10-29
Supplement: pone.0109528.s001.pdf [file pone.0109528.s001.pdf]

## Supporting Information

**Dental impressions and tooth wear analysis.** Linear measurements of exposed dentine on the metaconid and the hypoconid of the second mandibular molar were taken from the 15x images using Image Pro Plus Software. In addition, prepared dental molds were scanned using Nextec Hawk 3D laser scanner at 20um resolution to better visualize wear, then the 3-D scans were analyzed for orientation patch counts (OPC) using Amira software.

For the hypoconid wear, a line was drawn connecting the metaconid and the entoconid (along the entocristid) and dentine exposure of the hypoconid was measured by drawing a perpendicular line from the entocristid-line through the hypoconid (showing maximum wear, highlighted in yellow). For the metaconid wear, a line was drawn connecting the hypoconid and the entoconid (along the postcristid) and dentine exposure of the metaconid was measured by drawing a perpendicular line from the postcristid-line through the metaconid (showing maximum wear, highlighted in orange). Whereas the entoconid showed measurable wear, the hypoconid and metaconid provided the most consistent wear measurements (The  $R^2$  values for hypoconid, metaconid, and entoconid were 0.932, 0.887, and 0.779 respectively). The wear on the protoconid became difficult to measure in worn teeth. While other cusps also showed wear, we found the metaconid and the hypoconid to be most consistently worn in these small teeth (Supp. Fig. 1). The initial tabulations of results show that wear is largely linear from capture to capture irrespective of the stage of wear (Fig. 1b, Supp. Table 1).

**Survival Analysis.** There is no formal goodness-of-fit statistic for the robust design with covariates, so we collapsed secondary capture histories within each primary period to form an open capture-recapture dataset. From this we conducted goodness of fit to evaluate violations of model assumptions of our most general model (survival and detection varying by age\*sex\*year) using program RELEASE [6]. The overall test (TEST1) of homogeneity of survival and capture probabilities by group indicated no lack of fit (Overall  $P=0.9961$ ). We also used TEST3 of program RELEASE to specifically test for transients that may bias the assumption of homogeneity of survival by group; we found no support for transients (Overall  $P=0.7707$ ). These results suggested that our general model was appropriate for the data.

The robust design includes temporary emigration parameters as a means to consider that some animals in the super-population (animals in the sampling area vicinity that were exposed to trapping efforts) were absent from the study site during sampling during some primary periods. However, we did not observe any individuals that were detected in one year, missed in a following year, and then detected in a subsequent year. Therefore we detected no temporary emigration and fixed these parameters.

**Table S1.** Number of individuals captured annually in each age class. Individuals classified as age “0” are predicted based on the number of females captured the previous year, assuming that every female gave birth to two offspring, which is the average litter size in brown mouse lemurs.

| <b>Age</b> | <b>2008</b> | <b>2009</b> | <b>2010</b> |
|------------|-------------|-------------|-------------|
| <b>0</b>   | 39          | 26          | 28          |
| <b>1</b>   | 20          | 21          | 18          |
| <b>2</b>   | 13          | 23          | 17          |
| <b>3</b>   | 9           | 10          | 12          |
| <b>4</b>   | 2           | 4           | 8           |
| <b>5</b>   | 7           | 3           | 3           |
| <b>6</b>   | 1           | 4           | 1           |
| <b>7</b>   | 2           | 1           | 1           |
| <b>8</b>   | 0           | 2           | 0           |

**Table S2.** Dental wear measurements from 2008-2010.

| <b>Year</b> | <b>Name</b> | <b>Sex</b> | <b>Hypoconid (µm)</b> | <b>Metaconid (µm)</b> | <b>Tooth length (µm)</b> |
|-------------|-------------|------------|-----------------------|-----------------------|--------------------------|
| 2008        | Irwin       | 0          | 74                    | 66                    | 1985                     |
| 2008        | Jumbo-score | 0          | 70                    | 70                    | 1882                     |
| 2008        | Kevin       | 0          | 85                    | 66                    | 1956                     |
| 2008        | Ian         | 0          | 81                    | 74                    | 1904                     |
| 2008        | Griffindor  | 0          | 103                   | 66                    | 1823                     |
| 2008        | Ryan        | 0          | 100                   | 74                    | 1845                     |
| 2008        | Rado        | 0          | 74                    | 107                   | 1889                     |
| 2008        | Scott       | 0          | 92                    | 111                   | 1974                     |
| 2008        | Gob         | 0          | 96                    | 107                   | 1967                     |
| 2008        | Turandot    | 0          | 100                   | 92                    | 1845                     |
| 2008        | Samson      | 0          | 107                   | 92                    | 1867                     |
| 2008        | Rigoletto   | 0          | 103                   | 100                   | 1771                     |
| 2008        | Rudolpho    | 0          | 103                   | 111                   | 1867                     |
| 2008        | Sam         | 0          | 103                   | 122                   | 1845                     |
| 2008        | Mark        | 0          | 122                   | 118                   | 1897                     |
| 2008        | Michael     | 0          | 114                   | 148                   | 1963                     |
| 2008        | Harley      | 0          | 129                   | 125                   | 1838                     |
| 2008        | Mamy        | 0          | 122                   | 140                   | 1863                     |
| 2008        | Aristide    | 0          | 92                    | 162                   | 1793                     |
| 2008        | Napolean    | 0          | 151                   | 107                   | 1812                     |
| 2008        | Pascal      | 0          | 148                   | 137                   | 1911                     |
| 2008        | Don         | 0          | 148                   | 148                   | 1985                     |
| 2008        | Ralala      | 0          | 125                   | 148                   | 1815                     |
| 2008        | Kerry       | 0          | 140                   | 129                   | 1779                     |

|      |               |   |     |     |      |
|------|---------------|---|-----|-----|------|
| 2008 | Lanto         | 0 | 137 | 188 | 1786 |
| 2008 | Kristopher    | 0 | 170 | 185 | 1926 |
| 2008 | Luka          | 0 | 192 | 218 | 1889 |
| 2008 | Barry-licious | 0 | 192 | 214 | 1860 |
| 2008 | Erik          | 0 | 196 | 207 | 1804 |
| 2008 | Randy         | 0 | 214 | 210 | 1867 |
| 2008 | Toky          | 0 | 255 | 214 | 2022 |
| 2008 | Randy         | 0 | 214 | 218 | 1860 |
| 2008 | Ismael        | 0 | 203 | 225 | 1753 |
| 2008 | Maeybe        | 1 | 52  | 66  | 1970 |
| 2008 | Reychell      | 1 | 77  | 66  | 2306 |
| 2008 | Lena          | 1 | 74  | 66  | 1963 |
| 2008 | Hyacinth      | 1 | 77  | 63  | 1934 |
| 2008 | Erin          | 1 | 81  | 59  | 1875 |
| 2008 | Hufflepuff    | 1 | 74  | 96  | 2037 |
| 2008 | Leila         | 1 | 85  | 74  | 1875 |
| 2008 | Violetta      | 1 | 70  | 81  | 1697 |
| 2008 | Mary          | 1 | 100 | 81  | 1756 |
| 2008 | Brunhilda     | 1 | 129 | 122 | 1974 |
| 2008 | Elphaba       | 1 | 151 | 114 | 2007 |
| 2008 | Carmen        | 1 | 122 | 114 | 1720 |
| 2008 | Manoli        | 1 | 155 | 111 | 1919 |
| 2008 | Preciosa      | 1 | 125 | 155 | 1897 |
| 2008 | Govinda       | 1 | 129 | 148 | 1734 |
| 2008 | Diggy         | 1 | 114 | 151 | 1653 |
| 2008 | Claudia       | 1 | 111 | 181 | 1797 |
| 2008 | Peggy         | 1 | 103 | 236 | 1948 |
| 2008 | Jacqueline    | 1 | 162 | 251 | 1875 |
| 2008 | Stacey        | 1 | 236 | 306 | 1904 |
| 2009 | Banghra       | 1 | 59  | 100 | 1934 |
| 2009 | Raozy         | 1 | 92  | 70  | 1934 |
| 2009 | Sasha         | 1 | 59  | 107 | 1860 |
| 2009 | Miora         | 1 | 48  | 129 | 1934 |
| 2009 | Obamanikwa    | 1 | 85  | 92  | 1926 |
| 2009 | Sweet Potato  | 1 | 66  | 111 | 1867 |
| 2009 | Iris          | 1 | 111 | 92  | 1882 |
| 2009 | Lalao         | 1 | 89  | 129 | 1993 |
| 2009 | Ravo          | 1 | 81  | 137 | 1849 |
| 2009 | Vienna        | 1 | 59  | 173 | 1875 |
| 2009 | Jessikwa      | 1 | 107 | 129 | 1882 |
| 2009 | Leila         | 1 | 103 | 140 | 1919 |
| 2009 | Mary          | 1 | 118 | 114 | 1830 |
| 2009 | Ravenclaw     | 1 | 89  | 196 | 2033 |
| 2009 | Mija          | 1 | 96  | 155 | 1771 |
| 2009 | Preciosa      | 1 | 137 | 170 | 1937 |

|      |              |   |     |     |      |
|------|--------------|---|-----|-----|------|
| 2009 | Brunhilda    | 1 | 140 | 162 | 1849 |
| 2009 | Carmen       | 1 | 133 | 148 | 1672 |
| 2009 | Persephone   | 1 | 125 | 159 | 1897 |
| 2009 | Violetta     | 1 | 114 | 155 | 1871 |
| 2009 | Govinda      | 1 | 177 | 155 | 1897 |
| 2009 | Claudia      | 1 | 155 | 218 | 1779 |
| 2009 | Elphaba      | 1 | 177 | 251 | 1970 |
| 2009 | Jacqueline   | 1 | 192 | 284 | 1926 |
| 2009 | Fern Gully   | 1 | 207 | 446 | 1970 |
| 2009 | Queenie      | 1 | 310 | 347 | 2011 |
| 2009 | Adafi        | 0 | 59  | 70  | 2162 |
| 2009 | Obama        | 0 | 85  | 63  | 1889 |
| 2009 | Akondro      | 0 | 81  | 66  | 1815 |
| 2009 | Harry Potter | 0 | 85  | 89  | 2066 |
| 2009 | Sharky       | 0 | 92  | 59  | 1764 |
| 2009 | Gandalf      | 0 | 77  | 114 | 2096 |
| 2009 | Ananas       | 0 | 81  | 100 | 1948 |
| 2009 | Zoolander    | 0 | 85  | 100 | 1963 |
| 2009 | Rajao        | 0 | 74  | 96  | 1779 |
| 2009 | Pappu        | 0 | 77  | 96  | 1793 |
| 2009 | Banana       | 0 | 92  | 77  | 1734 |
| 2009 | Shah Rukh    | 0 | 92  | 107 | 1934 |
| 2009 | Punjab       | 0 | 85  | 107 | 1793 |
| 2009 | Solofo       | 0 | 74  | 125 | 1749 |
| 2009 | Theo         | 0 | 114 | 107 | 1937 |
| 2009 | Kumar        | 0 | 92  | 118 | 1827 |
| 2009 | Zac Efron    | 0 | 96  | 114 | 1827 |
| 2009 | Zohdy        | 0 | 125 | 111 | 2007 |
| 2009 | Harold       | 0 | 103 | 122 | 1871 |
| 2009 | Johary       | 0 | 137 | 107 | 2022 |
| 2009 | Hurley       | 0 | 92  | 133 | 1797 |
| 2009 | Blarney      | 0 | 103 | 122 | 1793 |
| 2009 | Jersey       | 0 | 114 | 125 | 1897 |
| 2009 | Mugatu       | 0 | 140 | 114 | 1996 |
| 2009 | Jernvall     | 0 | 107 | 129 | 1804 |
| 2009 | Scott        | 0 | 114 | 148 | 1915 |
| 2009 | Ian          | 0 | 92  | 107 | 1812 |
| 2009 | Ryan         | 0 | 103 | 122 | 1867 |
| 2009 | Borat        | 0 | 92  | 162 | 1797 |
| 2009 | Nordiny      | 0 | 107 | 155 | 1793 |
| 2009 | Godzilla     | 0 | 133 | 221 | 2133 |
| 2009 | Kerry        | 0 | 148 | 148 | 1771 |
| 2009 | Napolean     | 0 | 159 | 125 | 1852 |
| 2009 | Ralala       | 0 | 170 | 148 | 1852 |
| 2009 | Mamy         | 0 | 170 | 188 | 1908 |

|      |             |   |     |     |      |
|------|-------------|---|-----|-----|------|
| 2009 | Mark        | 0 | 199 | 173 | 1815 |
| 2009 | Pascal      | 0 | 162 | 210 | 1815 |
| 2009 | Aristide    | 0 | 125 | 314 | 1878 |
| 2009 | Michael     | 0 | 177 | 240 | 1952 |
| 2009 | Boris       | 0 | 273 | 232 | 1930 |
| 2009 | Randy       | 0 | 225 | 251 | 1875 |
| 2009 | Toky        | 0 | 354 | 188 | 2048 |
| 2009 | Ismael      | 0 | 225 | 332 | 1849 |
| 2010 | Addie       | 1 | 80  | 60  | 1830 |
| 2010 | Alessandra  | 1 | 80  | 70  | 1810 |
| 2010 | Barble      | 1 | 120 | 110 | 1850 |
| 2010 | Brunhilda   | 1 | 130 | 216 | 1880 |
| 2010 | Charlotte   | 1 | 80  | 90  | 1930 |
| 2010 | Claudia     | 1 | 190 | 220 | 1810 |
| 2010 | Digit       | 1 | 70  | 120 | 1870 |
| 2010 | Gaga        | 1 | 70  | 80  | 1840 |
| 2010 | Iris        | 1 | 49  | 82  | 1900 |
| 2010 | Juliet      | 1 | 70  | 83  | 1907 |
| 2010 | Kate        | 1 | 58  | 88  | 1861 |
| 2010 | Lalao       | 1 | 100 | 140 | 1900 |
| 2010 | Libby       | 1 | 90  | 91  | 1885 |
| 2010 | Liza        | 1 | 74  | 91  | 1836 |
| 2010 | Lotta       | 1 | 69  | 95  | 1850 |
| 2010 | Lolita      | 1 | 93  | 115 | 1784 |
| 2010 | Lourdes     | 1 | 100 | 155 | 1706 |
| 2010 | Marwa       | 1 | 125 | 140 | 1827 |
| 2010 | Miora       | 1 | 90  | 145 | 1874 |
| 2010 | Onja        | 1 | 100 | 140 | 1899 |
| 2010 | Persephone  | 1 | 185 | 220 | 1958 |
| 2010 | Ravenclaw   | 1 | 125 | 140 | 1950 |
| 2010 | Turandot    | 1 | 135 | 210 | 1930 |
| 2010 | Adafi       | 0 | 90  | 110 | 2070 |
| 2010 | Adonis      | 0 | 90  | 120 | 1700 |
| 2010 | Ben         | 0 | 110 | 130 | 1740 |
| 2010 | Blarney     | 0 | 110 | 170 | 1800 |
| 2010 | Borat       | 0 | 170 | 150 | 1810 |
| 2010 | Christopher | 0 | 110 | 110 | 1910 |
| 2010 | Esquelito   | 0 | 92  | 102 | 1820 |
| 2010 | Fanks       | 0 | 90  | 90  | 1880 |
| 2010 | Garth       | 0 | 170 | 220 | 1950 |
| 2010 | Gandalf     | 0 | 118 | 119 | 1762 |
| 2010 | Gonzales    | 0 | 99  | 90  | 1740 |
| 2010 | Ian         | 0 | 120 | 160 | 1860 |
| 2010 | Igor        | 0 | 68  | 143 | 1906 |
| 2010 | Jersey      | 0 | 130 | 138 | 1858 |

|      |            |   |     |     |      |
|------|------------|---|-----|-----|------|
| 2010 | Jernvall   | 0 | 133 | 140 | 1805 |
| 2010 | Jin        | 0 | 88  | 116 | 1873 |
| 2010 | Jeff       | 0 | 58  | 123 | 1790 |
| 2010 | Kahn       | 0 | 97  | 87  | 1956 |
| 2010 | Kerry      | 0 | 170 | 200 | 1784 |
| 2010 | Laurent    | 0 | 134 | 111 | 1868 |
| 2010 | Mamy       | 0 | 178 | 295 | 1977 |
| 2010 | Manatena   | 0 | 90  | 130 | 1734 |
| 2010 | Mangovetra | 0 | 110 | 137 | 1858 |
| 2010 | Mark       | 0 | 188 | 220 | 1802 |
| 2010 | Napolean   | 0 | 183 | 178 | 1799 |
| 2010 | Pappu      | 0 | 62  | 140 | 1765 |
| 2010 | Rachootin  | 0 | 82  | 83  | 1931 |
| 2010 | Rajao      | 0 | 89  | 120 | 1828 |
| 2010 | Scott      | 0 | 132 | 204 | 1862 |
| 2010 | Sawyer     | 0 | 145 | 178 | 1972 |
| 2010 | Sherman    | 0 | 248 | 208 | 1870 |
| 2010 | Solofo     | 0 | 142 | 166 | 1851 |
| 2010 | Taz        | 0 | 183 | 170 | 1855 |
| 2010 | Teemu      | 0 | 112 | 137 | 1880 |
| 2010 | Zohdy      | 0 | 160 | 173 | 2058 |
| 2010 | Zoolander  | 0 | 112 | 170 | 2025 |
| 2010 | Ole        | 0 | 168 | 139 | 2025 |

**Table S3.** Individual lemurs captured 3 or more consecutive years. In the table below, the linear regression slopes and reduced major axis (RMA) slopes are presented for individuals captured 3 or more consecutive years. The  $R^2$  values show intra-individual linear wear. Raw dental measurements are in table S9.

| <b>Name</b>      | <b>Linear slope</b> | <b>R<sup>2</sup></b> | <b>RMA slope</b> |
|------------------|---------------------|----------------------|------------------|
| <b>Ingrid</b>    | 616.48              | 0.90                 | 650.99           |
| <b>Anja</b>      | 654.84              | 0.96                 | 668.33           |
| <b>Stacey</b>    | 650.73              | 0.97                 | 661.04           |
| <b>Marcela</b>   | 706.05              | 0.99                 | 707.16           |
| <b>Carla</b>     | 490.51              | 0.95                 | 504.27           |
| <b>Claudia</b>   | 731.20              | 0.98                 | 740.42           |
| <b>Govinda</b>   | 789.99              | 0.95                 | 809.83           |
| <b>Jaqueline</b> | 676.13              | 0.95                 | 691.89           |
| <b>Preciosa</b>  | 1177.43             | 0.98                 | 1190.16          |
| <b>Jenna</b>     | 767.91              | 0.99                 | 772.70           |
| <b>Sherry</b>    | 676.82              | 0.55                 | 916.12           |
| <b>Aristide</b>  | 355.36              | 0.80                 | 397.49           |
| <b>Ismael</b>    | 611.50              | 0.94                 | 629.70           |
| <b>Kerry</b>     | 966.35              | 0.98                 | 976.78           |
| <b>Mamy</b>      | 582.78              | 0.96                 | 594.87           |
| <b>Mark</b>      | 447.03              | 0.95                 | 459.36           |
| <b>Napolean</b>  | 900.55              | 0.93                 | 932.56           |
| <b>Pascal</b>    | 569.15              | 0.96                 | 581.04           |
| <b>Ralala</b>    | 782.25              | 0.98                 | 790.72           |
| <b>Scott</b>     | 799.68              | 0.99                 | 803.66           |
| <b>Mickey</b>    | 684.35              | 0.97                 | 695.84           |
| <b>Ziggy</b>     | 1010.69             | 0.99                 | 1017.34          |
| <b>Loco</b>      | 549.62              | 0.97                 | 558.10           |

**Table S4.** Predicted ages based on dental wear compared to minimum possible ages based on trapping data. The 17 individuals that had underestimated ages are highlighted in yellow.

| Predicted | Minimum | Frequency | Predicted | Minimum | Frequency |
|-----------|---------|-----------|-----------|---------|-----------|
| 1         | 1       | 62        | 9         | 5       | 0         |
| 2         | 1       | 43        | 1         | 6       | 0         |
| 3         | 1       | 9         | 2         | 6       | 0         |
| 4         | 1       | 5         | 3         | 6       | 0         |
| 5         | 1       | 5         | 4         | 6       | 0         |
| 6         | 1       | 2         | 5         | 6       | 0         |
| 7         | 1       | 0         | 6         | 6       | 0         |
| 8         | 1       | 1         | 7         | 6       | 0         |
| 9         | 1       | 0         | 8         | 6       | 1         |
| 1         | 2       | 9         | 9         | 6       | 0         |
| 2         | 2       | 21        | 1         | 7       | 0         |
| 3         | 2       | 15        | 2         | 7       | 0         |
| 4         | 2       | 4         | 3         | 7       | 0         |
| 5         | 2       | 3         | 4         | 7       | 0         |
| 6         | 2       | 2         | 5         | 7       | 0         |
| 7         | 2       | 0         | 6         | 7       | 0         |
| 8         | 2       | 0         | 7         | 7       | 0         |
| 9         | 2       | 0         | 8         | 7       | 0         |
| 1         | 3       | 0         | 9         | 7       | 0         |
| 2         | 3       | 2         | 1         | 8       | 0         |
| 3         | 3       | 12        | 2         | 8       | 0         |
| 4         | 3       | 5         | 3         | 8       | 0         |
| 5         | 3       | 4         | 4         | 8       | 0         |
| 6         | 3       | 2         | 5         | 8       | 0         |
| 7         | 3       | 0         | 6         | 8       | 0         |
| 8         | 3       | 1         | 7         | 8       | 0         |
| 9         | 3       | 0         | 8         | 8       | 0         |
| 1         | 4       | 0         | 9         | 8       | 0         |
| 2         | 4       | 0         | 1         | 9       | 0         |
| 3         | 4       | 4         | 2         | 9       | 0         |
| 4         | 4       | 8         | 3         | 9       | 0         |
| 5         | 4       | 1         | 4         | 9       | 0         |
| 6         | 4       | 5         | 5         | 9       | 0         |
| 7         | 4       | 0         | 6         | 9       | 0         |
| 8         | 4       | 0         | 7         | 9       | 0         |
| 9         | 4       | 0         | 8         | 9       | 0         |
| 1         | 5       | 0         | 9         | 9       | 0         |
| 2         | 5       | 0         |           |         |           |
| 3         | 5       | 0         |           |         |           |
| 4         | 5       | 2         |           |         |           |
| 5         | 5       | 2         |           |         |           |



|   |   |   |  |  |  |
|---|---|---|--|--|--|
| 6 | 5 | 0 |  |  |  |
| 7 | 5 | 3 |  |  |  |
| 8 | 5 | 0 |  |  |  |

**Table S5.** Dental wear rates do not differ between the sexes. The RMA slopes of dental wear in individuals that were captured in 3 or more consecutive years do not differ between the sexes ( $t=0.66$ ,  $P=0.516$ )

| <b>Females</b> | <b>Males</b> |
|----------------|--------------|
| 650.9992       | 397.4866     |
| 668.3304       | 629.7099     |
| 661.0471       | 976.7846     |
| 707.1551       | 594.8693     |
| 504.2667       | 459.3571     |
| 740.4206       | 932.56       |
| 809.826        | 581.0368     |
| 691.8931       | 790.7225     |
| 1190.16        | 803.6585     |
| 772.6956       | 695.8414     |
| 916.1203       | 1017.337     |
|                | 558.098      |

**Table S6.** Model selection statistics for closed robust capture-recapture analyses of *Microcebus rufus*.

| Model <sup>1</sup>                                                  | AIC <sub>c</sub> | ΔAIC <sub>c</sub> | AIC <sub>c</sub><br>Weight | Model<br>Likelihood | No.<br>Parameter<br>s | Deviance |
|---------------------------------------------------------------------|------------------|-------------------|----------------------------|---------------------|-----------------------|----------|
| $S(\text{age}(T_L) + \text{sex}) \pi(.) p(\text{het} + \text{sex})$ | 2315.134         | 0.000             | 0.395                      | 1.000               | 7                     | 2300.856 |
| $S(\text{age}(T_L)) \pi(.) p(\text{het} + \text{sex})$              | 2315.534         | 0.400             | 0.323                      | 0.819               | 6                     | 2303.326 |
| $S(\text{age}(T_Q) + \text{sex}) \pi(.) p(\text{het} + \text{sex})$ | 2317.137         | 2.003             | 0.145                      | 0.367               | 8                     | 2300.779 |
| $S(\text{age}(T_Q)) \pi(.) p(\text{het} + \text{sex})$              | 2317.593         | 2.459             | 0.116                      | 0.292               | 7                     | 2303.315 |
| $S(\text{age} + \text{sex}) \pi(.) p(\text{het} + \text{sex})$      | 2321.863         | 6.730             | 0.013                      | 0.035               | 11                    | 2299.202 |
| $S(\text{age}) \pi(.) p(\text{het} + \text{sex})$                   | 2323.256         | 8.122             | 0.007                      | 0.017               | 10                    | 2302.706 |
| $S(\text{age} + \text{sex}) (.) \pi(.) p(\text{het})$               | 2329.424         | 14.290            | 0.000                      | 0.000               | 10                    | 2308.874 |
| $S(.) \pi(.) p(\text{het} + \text{sex})$                            | 2339.377         | 24.244            | 0.000                      | 0.000               | 5                     | 2329.229 |
| $S(\text{sex}) (.) \pi(.) p(\text{het} + \text{sex})$               | 234.312          | 25.178            | 0.000                      | 0.000               | 6                     | 2328.104 |
| $S(.) \pi(\text{year}) p(\text{het} * \text{year}) + \text{sex})$   | 234.891          | 25.758            | 0.000                      | 0.000               | 13                    | 2313.974 |
| $S(\text{year}) \pi(.) p(\text{het} + \text{sex})$                  | 2342.593         | 27.460            | 0.000                      | 0.000               | 7                     | 2328.315 |
| $S(\text{year} + \text{sex}) \pi(.) p(\text{het} + \text{sex})$     | 2343.68          | 28.546            | 0.000                      | 0.000               | 8                     | 2327.322 |
| $S(.) \pi(\text{year}) p(\text{year} * \text{het})$                 | 2345.632         | 30.499            | 0.000                      | 0.000               | 12                    | 2320.849 |
| $S(.) \pi(.) p(\text{het})$                                         | 2345.8.2         | 30.668            | 0.000                      | 0.000               | 4                     | 2337.703 |
| $S(\text{sex}) \pi(.) p(\text{het})$                                | 2347.61          | 32.477            | 0.000                      | 0.000               | 5                     | 2337.462 |
| $S(\text{year}) \pi(.) p(\text{het})$                               | 2348.919         | 33.785            | 0.000                      | 0.000               | 6                     | 2337.462 |
| $S(.) p(\text{age} * \text{year})$                                  | 2428.446         | 113.313           | 0.000                      | 0.000               | 21                    | 2336.711 |
| $S(.) p(\text{age} + \text{sex})$                                   | 2435.551         | 120.418           | 0.000                      | 0.000               | 7                     | 2384.071 |
| $S(.) p(\text{age})$                                                | 2441.522         | 126.389           | 0.000                      | 0.000               | 6                     | 2421.274 |
| $S(.) p(\text{year} + \text{sex})$                                  | 2445.635         | 130.501           | 0.000                      | 0.000               | 6                     | 2429.314 |
| $S(.) p((\text{age} * \text{year}) + \text{sex})$                   | 2446.964         | 131.831           | 0.000                      | 0.000               | 22                    | 2433.427 |
| $S(.) p(\text{year})$                                               | 2459.657         | 144.523           | 0.000                      | 0.000               | 5                     | 2400.356 |
| $S(.) p(\text{sex})$                                                | 2466.131         | 150.997           | 0.000                      | 0.000               | 3                     | 2449.509 |
| $S(.) p(.)$                                                         | 2478.495         | 163.362           | 0.000                      | 0.000               | 2                     | 2460.072 |

<sup>1</sup>Survival, S, is modeled as varying by *year*, *sex*, *age*, *age* and *sex* (e.g *age* + *sex*), *age* varying as a linear trend (*age*(*T<sub>L</sub>*)), *age* varying as a quadratic trend (*age*(*T<sub>Q</sub>*)), a trend and *sex*, or otherwise as constant (.). The probability of temporary emigration (*γ*) was consistent across all models as *γ*'=1 and *γ*"=0 to indicate no movement, due to data and lack of support for other variants in initial investigations. Probability of initial capture (*p*) and subsequent (*c*) recapture are equivalent for all models because the start of trapping occurred before the sampling period used for these analyses, thus a behavioral effect was unlikely. *p* and thus *c* are modeled as constant (.), varying by *sex*, *year*, heterogeneity (*het*), *age*, or mixed combinations. Heterogeneity was modeled using a finite mixture model of two-groups, where the proportion in each group was either constant or varied by *year*.

**Table S7.** Model-averaged annual survival probability estimates and standard errors. The numbers in bold are the survival probabilities calculated from mark recapture data, the numbers not bolded are the predicted survival probabilities based on the model trend.

| Age        | Annual Survival Probability | SE           |
|------------|-----------------------------|--------------|
| <b>1-2</b> | <b>0.804</b>                | <b>0.090</b> |
| <b>3</b>   | <b>0.739</b>                | <b>0.073</b> |
| <b>4</b>   | <b>0.667</b>                | <b>0.075</b> |
| <b>5</b>   | <b>0.591</b>                | <b>0.083</b> |
| <b>6</b>   | <b>0.509</b>                | <b>0.104</b> |
| 7          | 0.388                       |              |
| 8          | 0.319                       |              |
| 9          | 0.251                       |              |
| 10         | 0.182                       |              |
| 11         | 0.113                       |              |
| 12         | 0.045                       |              |

**Table S8.** Male and female fecal Testosterone values (ng/g). We found no significant difference in testosterone between the sexes. When controlling for date, using generalized linear mixed effect models (GLMM) with a gamma distribution and a log link, we found no significant difference between male and female fecal T levels  $F(1,81)=0.02$ ,  $P=0.90$ . Numbers in parentheses are the numerator and denominator degrees of freedom for corresponding F-values.

| <b>Males</b> | <b>Females</b> |
|--------------|----------------|
| <i>n</i> 339 | <i>n</i> 201   |
| Mean:12.11   | Mean: 12.87    |
| s.d: 11.14   | s.d: 12.28     |

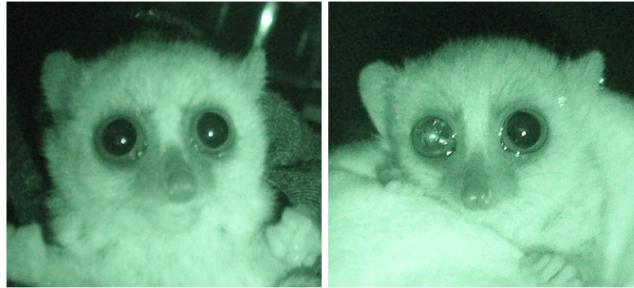

**Figure S1.** Examples of the infrared images taken to examine for cataracts. An individual without any ocular pathologies (left) and the only individual captured with any ocular pathology. This infection can be seen as a cloudy region on the lens of the animal's right eye (right).

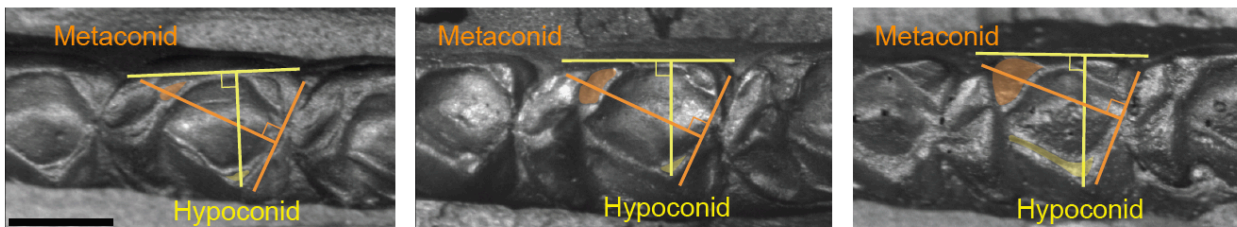

**Figure S2.** Method of dental wear measurements. Scale bar, 1 mm.

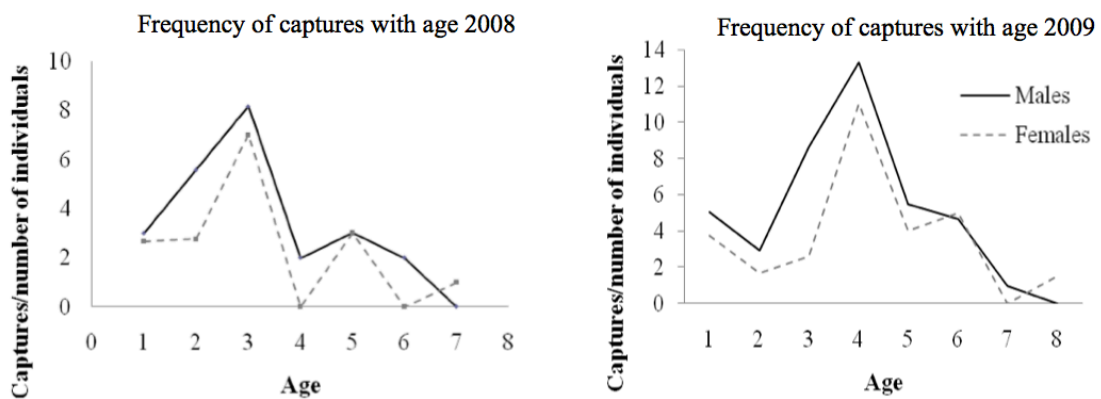

**Figure S3.** Recaptures within each season show no increased frequency of captures by age. We plotted the number of captures over the number of individuals in each age class (y-axis) against the age classes (x-axis).
